# Supplementary material
Source: Springer Nature journal article supplement (https://www.springermedizin.de/resource/supplementary/13058_2011_2872_MOESM4_ESM.pdf/9702768)

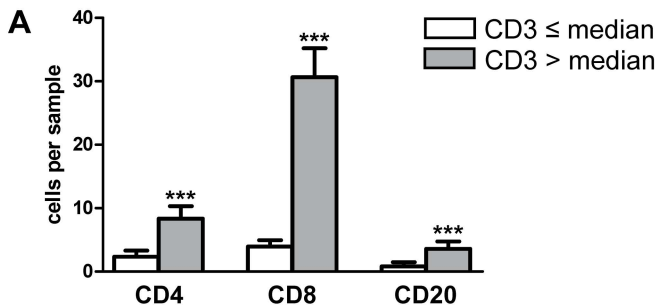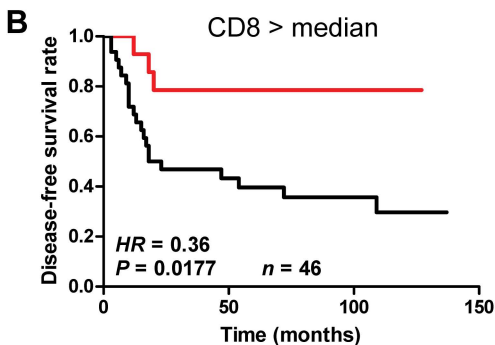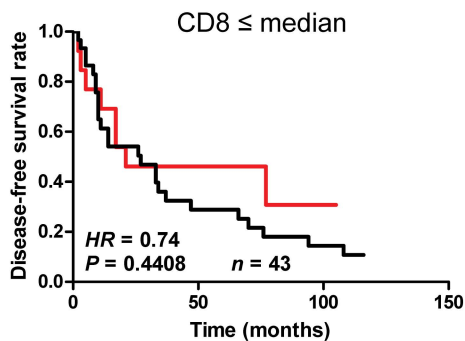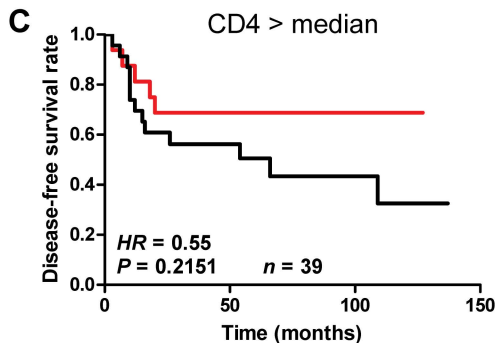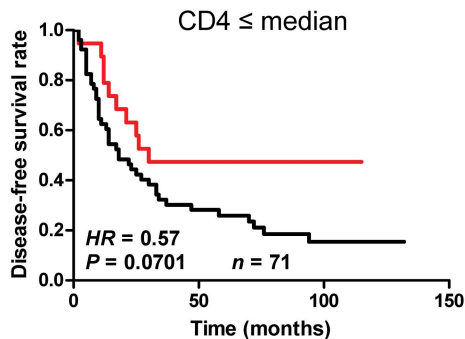

— Anthracycline-based therapy — No chemotherapy

Supplement: MOESM4 [file 9702768]
